# Supplementary material for: Drosophila Clock Is Required in Brain Pacemaker Neurons to Prevent Premature Locomotor Aging Independently of Its Circadian Function
Source: PubMed Central journal article supplement (PMC5224980; doi:10.1371/journal.pgen.1006507), 2017-01-10
Supplement: pgen.1006507.s010.pdf [file pgen.1006507.s010.pdf]

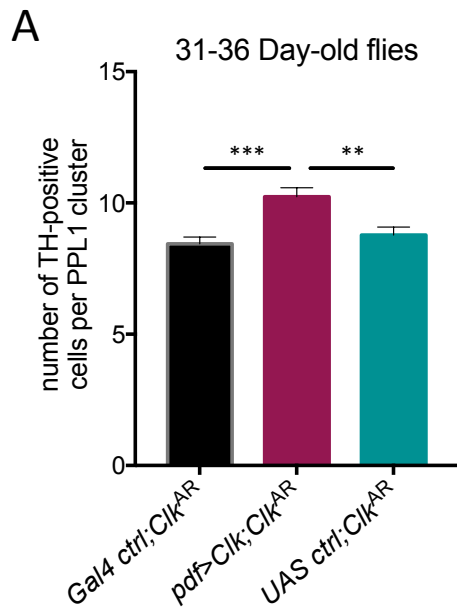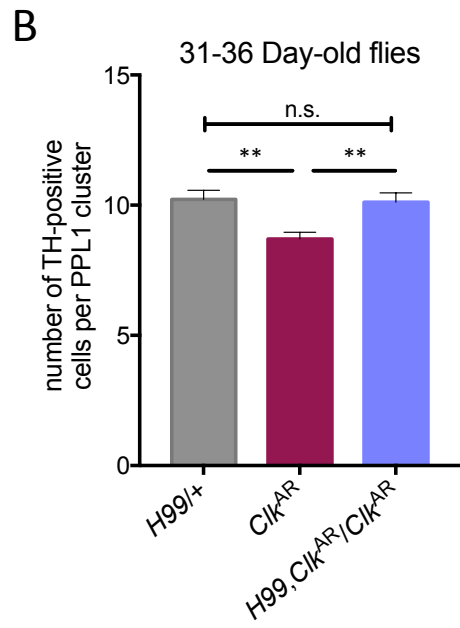

Figure S10
